# Supplementary material for: Active systemic lupus erythematosus is associated with a reduced cytokine production by B cells in response to TLR9 stimulation
Source: Springer Nature journal article supplement (doi:10.1186/s13075-014-0477-1), 2014-11-10
Supplement: MOESM1 [file 9783382]

## Additional file 1

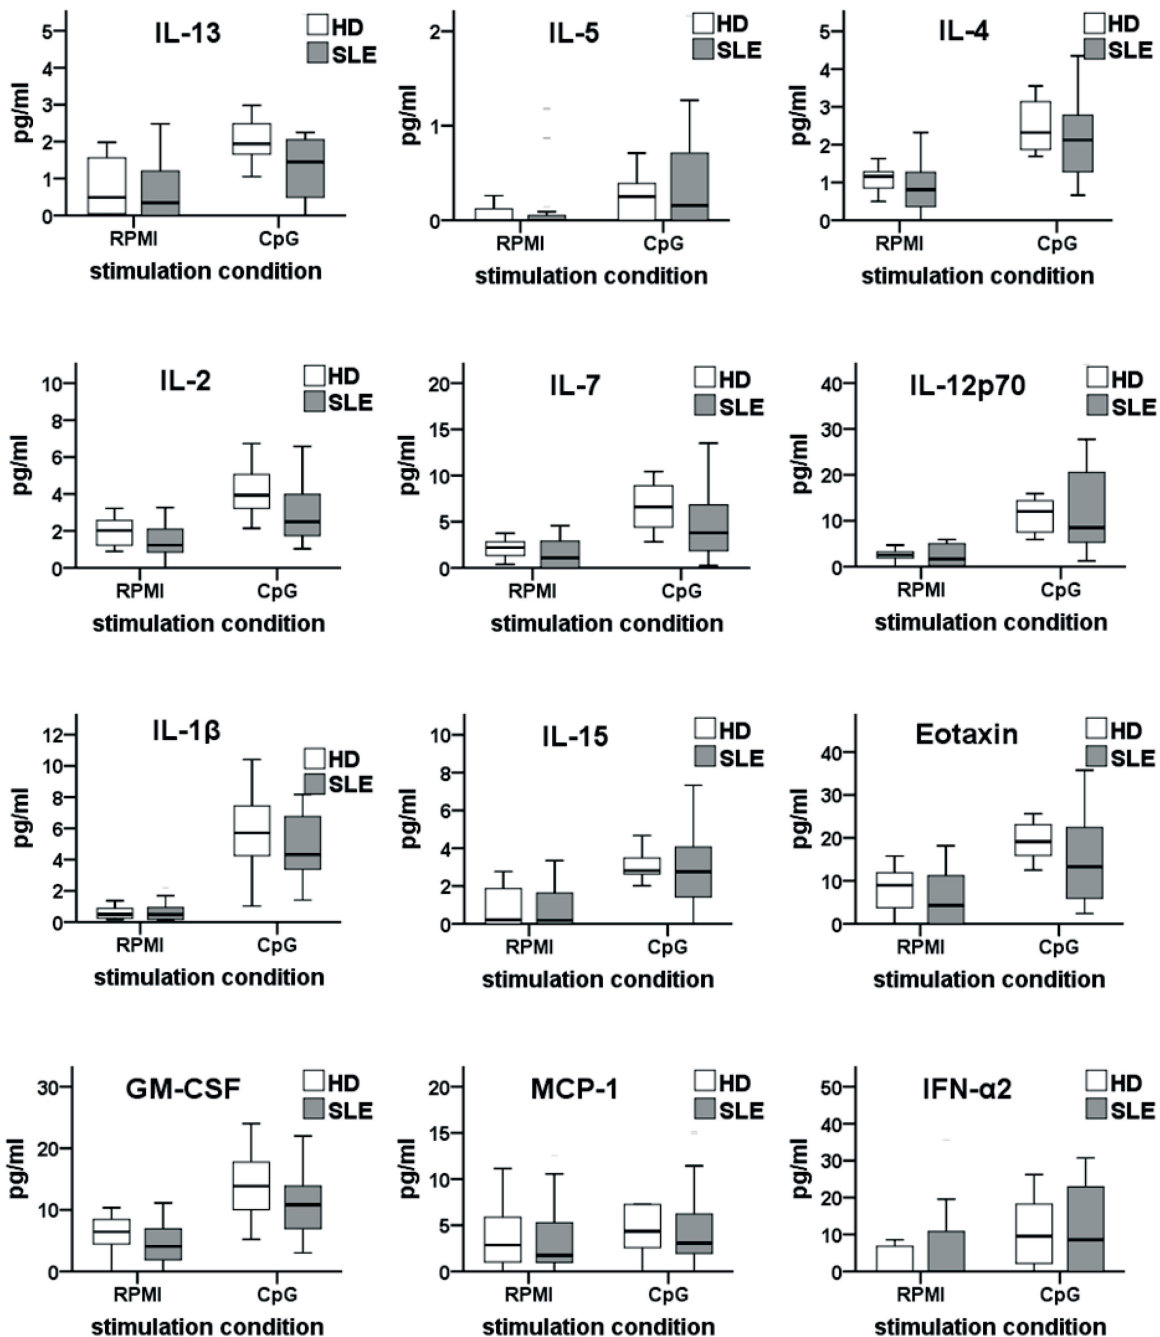

### Cytokines lacking substantial production upon TLR9 stimulation by B cells from healthy donors (white) and patients suffering from SLE (grey)

B cells from SLE-patients and healthy donors were purified and cultured with or without CpG, the cytokine concentrations were measured in supernatants collected after 2 days of culture by bioplex. The cytokines shown were detectable at very low levels after B-cell stimulation by TLR ligation using CpG (<20pg/mL of supernatant).
