# Supplementary figures and images for: Active systemic lupus erythematosus is associated with a reduced cytokine production by B cells in response to TLR9 stimulation
Source: Springer Nature journal article supplement (doi:10.1186/s13075-014-0477-1), 2014-11-10

**Figure 4**

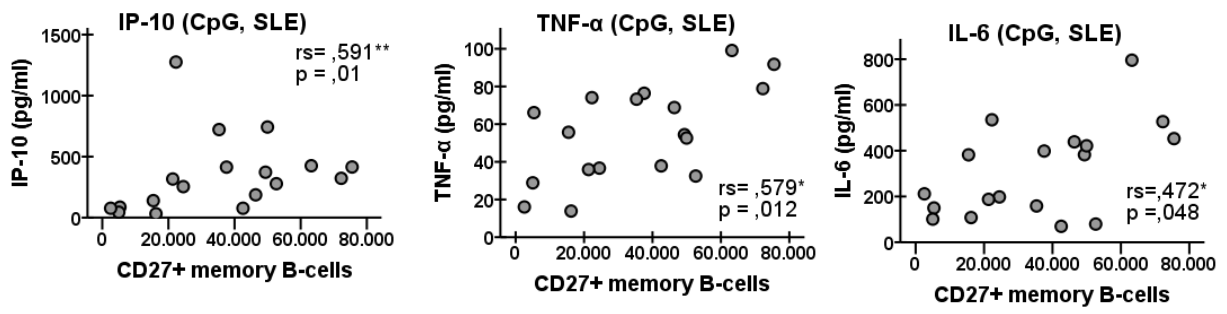

Supplement: MOESM8 [file 9783382]
